# Supplementary material
Source: PubMed Central journal article supplement (PMC8981550)
Supplement: sj-pdf-1-jrs-10.1177_01410768211073923.pdf [file sj-pdf-1-jrs-10.1177_01410768211073923.pdf]

**Figure S1: STROBE Checklist of items that should be included in reports of *cohort studies***

|                           | <b>Item No</b> | <b>Recommendation</b>                                                                                                                                                                                                                                                                                                  | <b>Page No</b> |
|---------------------------|----------------|------------------------------------------------------------------------------------------------------------------------------------------------------------------------------------------------------------------------------------------------------------------------------------------------------------------------|----------------|
| <b>Title and abstract</b> | 1              | (a) Indicate the study's design with a commonly used term in the title or the abstract<br>(b) Provide in the abstract an informative and balanced summary of what was done and what was found                                                                                                                          | 1              |
| <b>Introduction</b>       |                |                                                                                                                                                                                                                                                                                                                        |                |
| Background/rationale      | 2              | Explain the scientific background and rationale for the investigation being reported                                                                                                                                                                                                                                   | 4              |
| Objectives                | 3              | State specific objectives, including any prespecified hypotheses                                                                                                                                                                                                                                                       | 4              |
| <b>Methods</b>            |                |                                                                                                                                                                                                                                                                                                                        |                |
| Study design              | 4              | Present key elements of study design early in the paper                                                                                                                                                                                                                                                                | 5              |
| Setting                   | 5              | Describe the setting, locations, and relevant dates, including periods of recruitment, exposure, follow-up, and data collection                                                                                                                                                                                        | 5              |
| Participants              | 6              | (a) Give the eligibility criteria, and the sources and methods of selection of participants. Describe methods of follow-up<br><br>(b) For matched studies, give matching criteria and number of exposed and unexposed                                                                                                  | 5 & figure S2  |
| Variables                 | 7              | Clearly define all outcomes, exposures, predictors, potential confounders, and effect modifiers. Give diagnostic criteria, if applicable                                                                                                                                                                               | 5 & 6          |
| Data sources/measurement  | 8*             | For each variable of interest, give sources of data and details of methods of assessment (measurement). Describe comparability of assessment methods if there is more than one group                                                                                                                                   | 5 & 6          |
| Bias                      | 9              | Describe any efforts to address potential sources of bias                                                                                                                                                                                                                                                              | 6 & 7          |
| Study size                | 10             | Explain how the study size was arrived at                                                                                                                                                                                                                                                                              | 8              |
| Quantitative variables    | 11             | Explain how quantitative variables were handled in the analyses. If applicable, describe which groupings were chosen and why                                                                                                                                                                                           | 6 & 7          |
| Statistical methods       | 12             | (a) Describe all statistical methods, including those used to control for confounding<br>(b) Describe any methods used to examine subgroups and interactions<br>(c) Explain how missing data were addressed<br>(d) If applicable, explain how loss to follow-up was addressed<br>(e) Describe any sensitivity analyses | 6 & 7          |
| <b>Results</b>            |                |                                                                                                                                                                                                                                                                                                                        |                |
| Participants              | 13*            | (a) Report numbers of individuals at each stage of study—eg numbers potentially eligible, examined for eligibility, confirmed eligible, included in the study, completing follow-up, and analysed<br>(b) Give reasons for non-participation at each stage<br>(c) Consider use of a flow diagram                        | 8 & figure S2  |
| Descriptive data          | 14*            | (a) Give characteristics of study participants (eg demographic, clinical, social) and information on exposures and potential confounders<br>(b) Indicate number of participants with missing data for each variable of interest<br>(c) Summarise follow-up time (eg, average and total amount)                         | 8              |
| Outcome data              | 15*            | Report numbers of outcome events or summary measures over time                                                                                                                                                                                                                                                         | 8              |

|                          |    |                                                                                                                                                                                                                                                                                                                                                                                                               |       |
|--------------------------|----|---------------------------------------------------------------------------------------------------------------------------------------------------------------------------------------------------------------------------------------------------------------------------------------------------------------------------------------------------------------------------------------------------------------|-------|
| Main results             | 16 | (a) Give unadjusted estimates and, if applicable, confounder-adjusted estimates and their precision (eg, 95% confidence interval). Make clear which confounders were adjusted for and why they were included<br>(b) Report category boundaries when continuous variables were categorized<br>(c) If relevant, consider translating estimates of relative risk into absolute risk for a meaningful time period | 8 & 9 |
| Other analyses           | 17 | Report other analyses done—eg analyses of subgroups and interactions, and sensitivity analyses                                                                                                                                                                                                                                                                                                                | 8 & 9 |
| <b>Discussion</b>        |    |                                                                                                                                                                                                                                                                                                                                                                                                               |       |
| Key results              | 18 | Summarise key results with reference to study objectives                                                                                                                                                                                                                                                                                                                                                      | 10    |
| Limitations              | 19 | Discuss limitations of the study, taking into account sources of potential bias or imprecision. Discuss both direction and magnitude of any potential bias                                                                                                                                                                                                                                                    | 11    |
| Interpretation           | 20 | Give a cautious overall interpretation of results considering objectives, limitations, multiplicity of analyses, results from similar studies, and other relevant evidence                                                                                                                                                                                                                                    | 11    |
| Generalisability         | 21 | Discuss the generalisability (external validity) of the study results                                                                                                                                                                                                                                                                                                                                         | 11    |
| <b>Other information</b> |    |                                                                                                                                                                                                                                                                                                                                                                                                               |       |
| Funding                  | 22 | Give the source of funding and the role of the funders for the present study and, if applicable, for the original study on which the present article is based                                                                                                                                                                                                                                                 | 2     |

\*Give information separately for exposed and unexposed groups.

**Figure S2: Flow chart of participants included in the analysis**

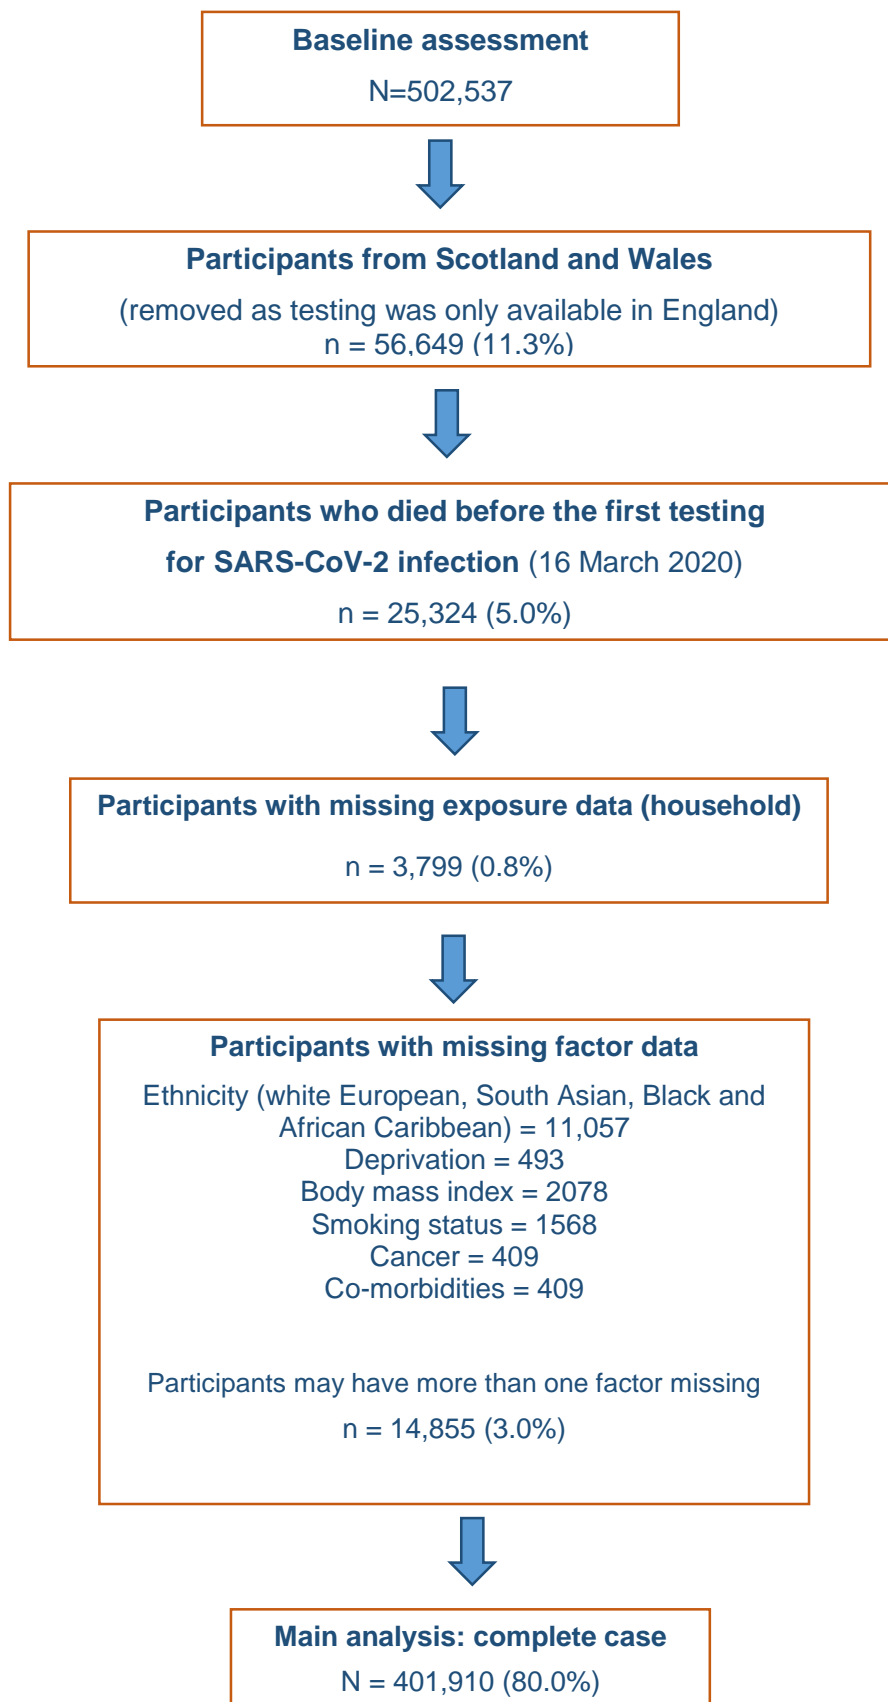

**Table S1: Results for the fully adjusted logistic regression model (N=401,910)**

| Variable                                                      | Odds ratio (95% CI)<br>for severe Covid-19 | Odds ratio (95% CI)<br>for mild Covid-19 |
|---------------------------------------------------------------|--------------------------------------------|------------------------------------------|
| 1 person household (2 person is the reference)                | 1.24 (1.14, 1.36)                          | 0.88 (0.82, 0.93)                        |
| 3 or more (2 person household is the reference)               | 1.28 (1.18, 1.39)                          | 1.50 (1.44, 1.58)                        |
| Age at time of COVID-19 test                                  | 1.04 (1.03, 1.05)                          | 0.96 (0.95, 0.96)                        |
| Sex (Female is the reference)                                 | 1.45 (1.35, 1.55)                          | 0.95 (0.92, 0.99)                        |
| Townsend Score                                                | 1.08 (1.07, 1.09)                          | 1.04 (1.04, 1.05)                        |
| BMI (kg/m <sup>2</sup> )                                      | 1.07 (1.06, 1.07)                          | 1.03 (1.02, 1.03)                        |
| Cancer, current or previous (No is the reference)             | 1.11 (0.99, 1.25)                          | 0.96 (0.89, 1.03)                        |
| One of more comorbidities (No is the reference)               | 1.53 (1.39, 1.68)                          | 0.96 (0.92, 1.01)                        |
| Smoking status, previous (Never is the reference)             | 1.30 (1.20, 1.39)                          | 1.11 (1.06, 1.16)                        |
| Smoking status, current (Never is the reference)              | 1.60 (1.44, 1.78)                          | 1.03 (0.97, 1.10)                        |
| Health worker status (No is the reference)                    | 1.27 (1.01, 1.89)                          | 0.80 (0.66, 0.97)                        |
| South Asian (White European is the reference)                 | 2.38 (1.99, 2.84)                          | 1.77 (1.60, 1.96)                        |
| Black and African Caribbean (White European is the reference) | 1.73 (1.44, 2.07)                          | 1.13 (1.01, 1.27)                        |

**Table S2: COVID-19 status by missing information**

| COVID-19 status | Included in complete-case<br>analysis (N=401,910) | Excluded from analysis due<br>to missing data (N=14,855) |
|-----------------|---------------------------------------------------|----------------------------------------------------------|
| None            | 387,034 (96.3)                                    | 17,734 (95.1)                                            |
| Non-severe      | 11,264 (2.8)                                      | 633 (3.4)                                                |
| Severe          | 3,612 (0.9)                                       | 287 (1.5)                                                |

Values reported are n(%)
